# Supplementary material for: Investigation of the Sn4+-distribution and photocatalytic performance of Sn4+/TiO2 hollow fiber nanomaterials
Source: Royal Society of Chemistry journal article supplement (doi:10.1039/d1nj04905d), 2022-01-01
Supplement: d1nj04905d1.pdf [file d1nj04905d1.pdf]

## **Investigation of Sn<sup>4+</sup>-distribution and photocatalytic performance of Sn<sup>4+</sup>/TiO<sub>2</sub> hollow fiber nanomaterials**

Yixin Liu<sup>a,†</sup>, Guizhen Mu<sup>a,†</sup>, Shunli Yu<sup>a</sup>, Hao Luo<sup>a</sup>, Ming Zhong<sup>b,\*</sup>, Na Dong<sup>c</sup>, Bitao Su<sup>a,\*</sup>

<sup>a</sup> Key Laboratory of Eco-Functional Polymer Materials of the Ministry of Education, Key Laboratory of Eco-Environmental Polymer Materials of Gansu Province, College of Chemistry and Chemical Engineering, Northwest Normal University, Lanzhou 730070, China

<sup>b</sup> State Key Laboratory of Advanced Processing and Recycling of Nonferrous Metals, Lanzhou University of Technology, Lanzhou 730050, China

<sup>c</sup> Department of Chemistry, Gansu Medical college, Pingliang, Gansu, 744000, P. R. China

Corresponding author. Tel.: +86-15109314458

E-mail: [zhongming@lut.edu.cn](mailto:zhongming@lut.edu.cn); [subt0608@163.com](mailto:subt0608@163.com)

## Experimental section

### *Chemicals*

All of the reagents and solvents including tetrabutyl titanate ( $\text{Ti}(\text{OC}_4\text{H}_9)_4$ ), tin (IV) chloride pentahydrate ( $\text{SnCl}_4 \cdot 5\text{H}_2\text{O}$ ), anhydrous alcohol ( $\text{C}_2\text{H}_5\text{OH}$ ), and methylene blue (MB) were purchased commercially and analytically pure. Cotton fiber (CFs) were used as the templates.

### *Preparation of $\text{Sn}^{4+}$ -doped $\text{TiO}_2$ fibers*

$\text{Sn}^{4+}$ -doped  $\text{TiO}_2$  fibers were prepared through a novel and smart template-assisted two-step (dipping/adsorbing-calcining) method. In order to reflect the role of the distribution state of doped  $\text{Sn}^{4+}$  ions in improving the photocatalytic performance of  $\text{TiO}_2$ , a series of  $\text{Sn}^{4+}$ -doped  $\text{TiO}_2$  fibers with well-distribution and different amount (0.00~0.07 mol%) of  $\text{Sn}^{4+}$  ions were firstly prepared (named as  $\text{Sn}^{4+}/\text{TiO}_2\text{-A}$ ) for determining an optimal  $\text{Sn}^{4+}$ -doping amount (0.03 mol% in this study) by the degradation of MB. Then another series of 0.03 mol%  $\text{Sn}^{4+}$ -doped  $\text{TiO}_2$  fibers with different  $\text{Sn}^{4+}$ -distribution states (surface  $\rightarrow$  interface  $\rightarrow$ ..... $\rightarrow$  bulk) were prepared (named as  $\text{Sn}^{4+}/\text{TiO}_2\text{-B}$ ) for further investigating the influence of  $\text{Sn}^{4+}$ -distribution state on photocatalytic performance of  $\text{TiO}_2$ .

### *Preparation of $\text{Sn}^{4+}/\text{TiO}_2\text{-A}$*

Typical preparation process of  $\text{Sn}^{4+}/\text{TiO}_2\text{-A}$  samples is described as follows: firstly, 1.2000 g CFs were dipped into a  $(\text{Ti}(\text{OC}_4\text{H}_9)_4 + \text{SnCl}_4)/\text{EtOH}$  solution for 0.5 h to adsorb  $\text{Ti}^{4+}$  and  $\text{Sn}^{4+}$  ions on the surface of CFs. Then, the adsorbed ( $\text{Ti}^{4+}$  and  $\text{Sn}^{4+}$ ) CFs was naturally dried at room temperature to obtain a precursor, named as  $(\text{Ti}^{4+} + \text{Sn}^{4+})/\text{CFs}$ . Secondly, the  $(\text{Ti}^{4+} + \text{Sn}^{4+})/\text{CFs}$  precursor was calcined under air atmosphere at 600 °C for 2 h to remove CFs templates through its combustion and boost the conversion of adsorbed  $\text{Ti}^{4+}$  to  $\text{TiO}_2$  and entrance of  $\text{Sn}^{4+}$  ions into  $\text{TiO}_2$  lattice. By changing the mole content of  $\text{Sn}^{4+}$  to  $\text{Ti}^{4+}$  ions (0.00 to 0.07 mol%) in the solution of  $(\text{Ti}(\text{OC}_4\text{H}_9)_4 + \text{SnCl}_4)/\text{EtOH}$ , a series of samples with hollow fiber structure and well-distribution of  $\text{Sn}^{4+}$  ions were prepared, which were denoted as  $\text{Sn}^{4+}/\text{TiO}_2\text{-A-0.00}$ , 0.01, 0.03, 0.05, 0.07. Their photocatalytic results showed that the activity of the  $\text{Sn}^{4+}/\text{TiO}_2\text{-$

A-0.03% sample was the highest. So under doping 0.03%  $\text{Sn}^{4+}$ , another series of  $\text{Sn}^{4+}/\text{TiO}_2$  samples with different distribution states of doped  $\text{Sn}^{4+}$  would be prepared and used to further investigate the influence of  $\text{Sn}^{4+}$ -distribution state on photocatalytic performance of  $\text{TiO}_2$ .

#### Preparation of $\text{Sn}^{4+}/\text{TiO}_2$ -B

Another series of 0.03 mol%~ $\text{Sn}^{4+}/\text{TiO}_2$  samples with different  $\text{Sn}^{4+}$ -distribution states/depths were prepared by repeating the above-described template-assisted two-step method for twice.

$\text{TiO}_2$  fibers were firstly prepared *via* the two-step method. It was importantly mentioned that the calcining time “x” at the second calcination step varied from 20 to 100 mins. As-obtained hollow fibers were named as  $\text{TiO}_2$ -x (x = 20, 40, 50, 60, 100 mins)

A series of  $\text{Sn}^{4+}/\text{TiO}_2$ -B fibers materials were prepared from  $\text{TiO}_2$ -x by using the two-step method once more. 0.5000 g of as-prepared  $\text{TiO}_2$ -x were dipped in 10 mL  $\text{SnCl}_4/\text{EtOH}$  solution (the mole content of  $\text{Sn}^{4+}$  to  $\text{Ti}^{4+}$  ions: 0.03 mol%) for 1 h to adsorb  $\text{Sn}^{4+}$  ions on the surface of  $\text{TiO}_2$ -x nanofibers and then the adsorbed  $\text{Sn}^{4+}$   $\text{TiO}_2$ -x fibers naturally dried and were calcined at 600 °C for another time “y”, varying from 100 to 20 mins (keeping  $x + y = 2$  h), to prepare another series of 0.03 mol%  $\text{Sn}^{4+}/\text{TiO}_2$ . The as-prepared samples were successively labeled as  $\text{Sn}^{4+}/\text{TiO}_2$ -B-y/x: 20/100, 40/80, 50/70, 60/60, 100/20. During this calcining process, the adsorbed  $\text{Sn}^{4+}$  ions on the surface of  $\text{TiO}_2$  fibers heat-diffused into  $\text{TiO}_2$  lattice and the diffusing/entering depth varied with the calcining time y. So in the series 0.03 mol%  $\text{Sn}^{4+}/\text{TiO}_2$ -B,  $\text{Sn}^{4+}$ -distribution depth/state changed with the variation of the calcining time y.

#### *Characterization*

X-ray diffraction (XRD; D/Max-2400, Japan, with Cu Kr radiation ( $\lambda=1.5418\text{\AA}$ ) operating at 40 kV and 100 mA) was used to identify the phase structure of the samples, the morphologies of the samples were observed by field emission scanning electron microscopy (FESEM; JEOL, JSM-6701F, Japan) and transmission electron microscopy (TEM; JEOL, JEM-2010, Japan). Inductively Coupled Plasma Optical Emission

Spectrometer (ICP-OES) was used to determine the content of doped Sn<sup>4+</sup> ion. X-ray photoelectron spectroscopy (XPS) was operated on an AXIS SUPRA Versaprobe system. Ultraviolet-visible (UV-Vis) spectroscopy (UV-3600plus, Japan) was used to examine the UV-Vis absorption performance. Electrochemical impedance spectroscopy and Cyclic voltammetry (CV) were tested on the electrochemical station (CHI 660E, Chenhua).

#### *Photocatalytic test*

Photocatalytic experiments were performed on a XPA-7 (G8) photocatalytic reactor (Xujiang, Nanjing, China), described in the reference. 10 mg/L MB solution was used as simulation pollutant. Photocatalytic degradation reaction of MB was carried out in the tubes with 300 W high pressure Hg lamp and 10 cm light distance. 40 mg of the catalyst was added in 40 mL of MB solution. Before irradiation, the suspension system was maintained in dark for 0.5 h to establish adsorption-desorption equilibrium. Then, turning on the lamp, at a certain interval, 5 mL of suspension was separated by centrifugation to remove the powder. The absorbance value of the supernatant solution was measured at 664 nm ( $\lambda_{\max}$  of MB solution) and used to calculate the concentration ( $C_t$ ) of MB solution at reaction time  $t$ . The first-order kinetic degradation constant  $k_1$  of MB solution on the samples were used to evaluate their photocatalytic activity and calculated by the formulas:  $\ln C_0/C_t = k_1 t$ , in which  $C_0$  and  $C_t$  are the concentration values of MB solution at the initial time  $t = 0$  and reaction time  $t$ .

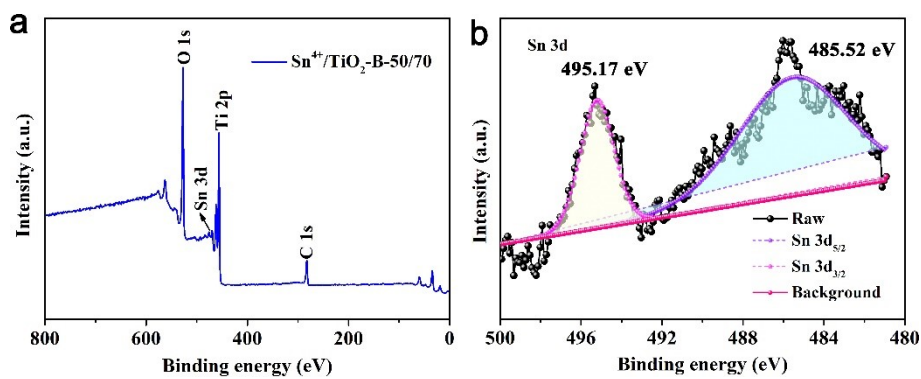

Figure S1. (a) Full spectrum, and (B) high-resolution XPS spectrum of Sn 3d for Sn<sup>4+</sup>/TiO<sub>2</sub>-B-50/70.

12/13/2021 17:12

PQ 9000  
Operator: 苏怡兵      Lab.: 兰州大学分析测试中心

**Results**  
Results file: C:\Users\Public\Documents\Analytik\_Jena\ASpec\PQ\ICP\RESULTS\苏非\_17339800118-21-12-13  
1703.tps  
Instrument: PQ 9000 #13-5850C-AQ103      Technique: ICP-OES  
Operator: 苏怡兵 (12/13/2021 17:04)  
Comment:  
Method: default(1)

| Line                                                                                               | Ints.    | Conc.1   | Unit                     | RSD[%]    | Conc.2 | Unit | CI     | Rem. |
|----------------------------------------------------------------------------------------------------|----------|----------|--------------------------|-----------|--------|------|--------|------|
| Cal-Zero1                                                                                          |          |          |                          |           |        |      |        |      |
| Line Sn189.927                                                                                     | 173      | 0        | mg/L                     |           |        |      |        |      |
| Cal-Std1                                                                                           |          |          |                          |           |        |      |        |      |
| Line Sn189.927                                                                                     | 1059     | 0.02     | mg/L                     |           |        |      |        |      |
| Cal-Std2                                                                                           |          |          |                          |           |        |      |        |      |
| Line Sn189.927                                                                                     | 3795     | 0.08     | mg/L                     |           |        |      |        |      |
| Cal-Std3                                                                                           |          |          |                          |           |        |      |        |      |
| Line Sn189.927                                                                                     | 18311    | 0.4      | mg/L                     |           |        |      |        |      |
| Cal-Std4                                                                                           |          |          |                          |           |        |      |        |      |
| Line Sn189.927                                                                                     | 48075    | 1        | mg/L                     |           |        |      |        |      |
| Compute calib: Sn189.927      R: 0.999977150 ; Slope: 45898.795 Ints./(mg/L) ; BEC: 0.0282971 mg/L |          |          |                          |           |        |      |        |      |
| Method SD: 0.0023366 mg/L      y=a+bx      a=112.81249 b=45898.795                                 |          |          |                          |           |        |      |        |      |
| Method: default(1)                                                                                 |          |          |                          |           |        |      |        |      |
| 1                                                                                                  | (Sample) | Pos: 101 | Date: 12/13/2021 5:09:10 |           |        |      |        |      |
| Pre-DF:                                                                                            | 1        | Wt.[g]:  | 0.0054                   | Vol.[mL]: | 25     |      |        |      |
| Blank corr.:                                                                                       | off      |          |                          |           |        |      |        |      |
| Line Sn189.927                                                                                     | 1356     | 0.0271   | mg/L                     | 1.08      | 0.0125 | m-%  | 0.0025 |      |
| 1                                                                                                  | (Sample) | Pos: 102 | Date: 12/13/2021 5:09:54 |           |        |      |        |      |
| Pre-DF:                                                                                            | 1        | Wt.[g]:  | 0.0054                   | Vol.[mL]: | 25     |      |        |      |
| Blank corr.:                                                                                       | off      |          |                          |           |        |      |        |      |
| Line Sn189.927                                                                                     | 1276     | 0.0253   | mg/L                     | 2.06      | 0.0117 | m-%  | 0.0025 |      |

Figure S2. ICP-OES result for optimal Sn<sup>4+</sup>/TiO<sub>2</sub>-B-50/70 sample.

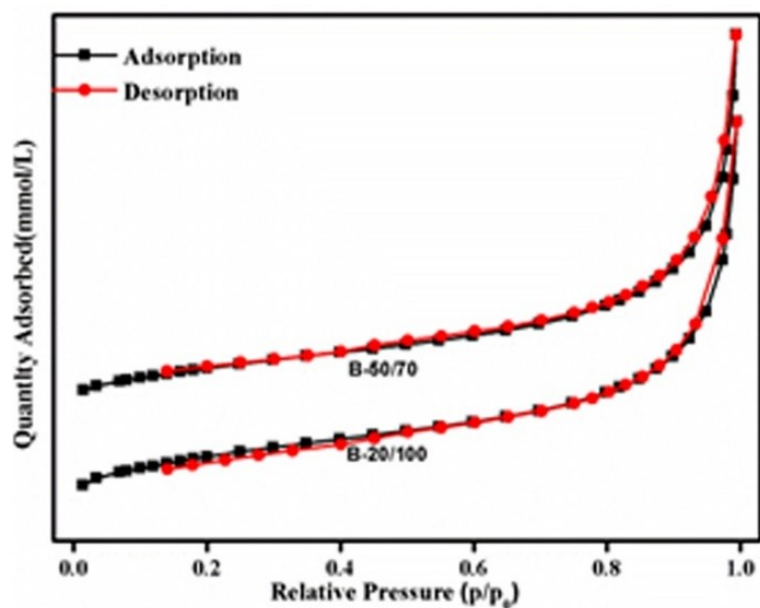

Figure S3.  $N_2$  adsorption-desorption isotherms of  $Sn^{4+}/TiO_2$ -B-20/100 and -50/70 samples.

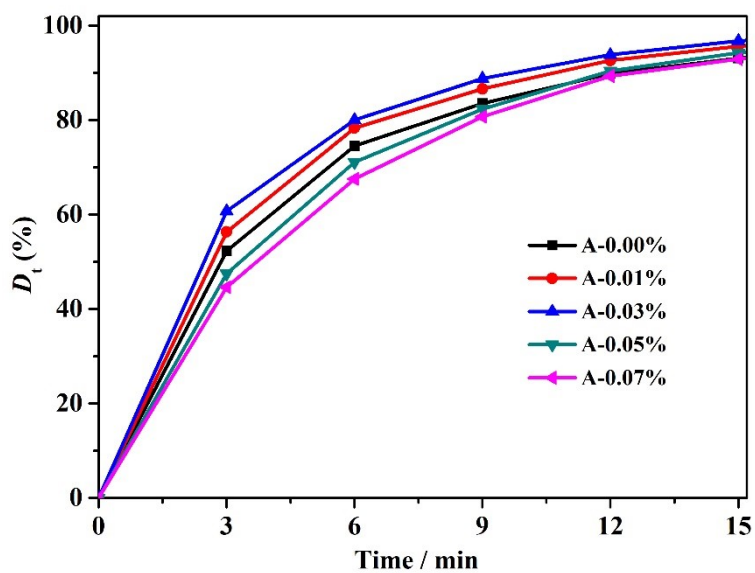

Figure S4.  $D_t \sim t$  curves of MB solution on the  $Sn^{4+}/TiO_2$ -A samples.

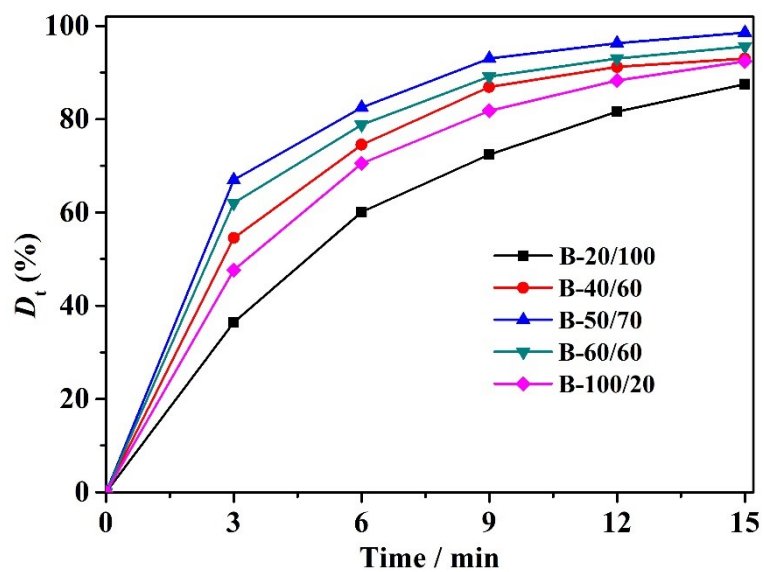

Figure S5.  $D_t \sim t$  curves of MB solution on the  $\text{Sn}^{4+}/\text{TiO}_2\text{-B}$  samples.

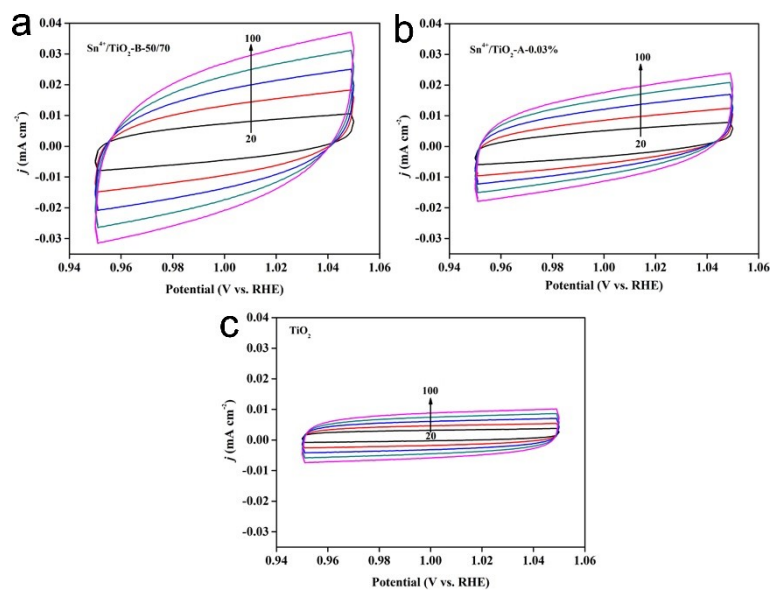

Figure S6. Cyclic voltammograms of (a)  $\text{Sn}^{4+}/\text{TiO}_2\text{-B-50/70}$ , (b)  $\text{Sn}^{4+}/\text{TiO}_2\text{-A-0.03\%}$ , and (c)  $\text{TiO}_2$  with various scan rates in 1.0 M KOH solution.

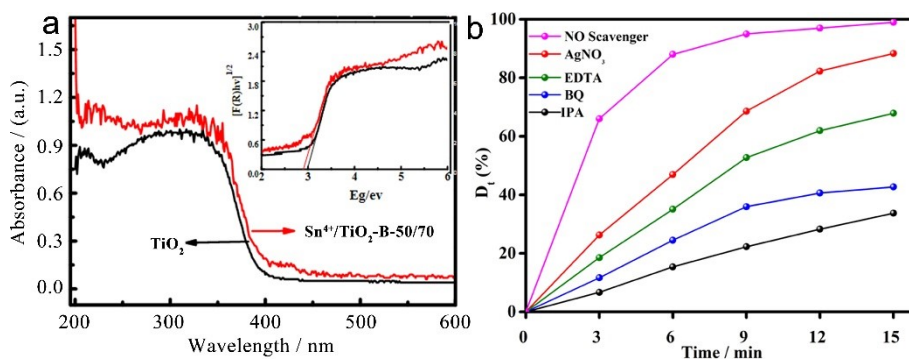

Figure S7. (a) UV-vis spectra of  $\text{TiO}_2$  and  $\text{Sn}^{4+}/\text{TiO}_2\text{-B-50/70}$  samples (Inset: energy band structure of  $\text{TiO}_2$  and  $\text{Sn}^{4+}/\text{TiO}_2\text{-B-50/70}$  samples); (b)  $D_t \sim t$  curves of MB solution on the  $\text{Sn}^{4+}/\text{TiO}_2\text{-B-50/70}$  under the presence of different scavengers.

Table S1. Comparison of  $\text{Sn}^{4+}/\text{TiO}_2\text{-B-50/70}$  sample with reported results in the literature.

| Catalyst                                            | Dye             | Degradation efficiency (%) | Time (min) | Kinetic constant ( $\text{min}^{-1}$ ) | Ref.                                                               |
|-----------------------------------------------------|-----------------|----------------------------|------------|----------------------------------------|--------------------------------------------------------------------|
| $\text{Sn}^{4+}/\text{TiO}_2\text{-B-50/70}$        | Methyl blue     | 98.6                       | 15         | 0.295                                  | <b>This work</b>                                                   |
| $\text{HfO}_2/\text{TiO}_2$ spherical nanoparticles | Methyl blue     | 90                         | 10         | --                                     | <i>Mater. Lett.</i> , 2018, <b>231</b> , 225                       |
| Fluorinated $\text{TiO}_2$ (0.63% F)                | Orange 4        | 80                         | 80         | 0.035                                  | <i>Sep. Purif. Technol.</i> , 2013, <b>108</b> , 51                |
| 1%-Ni doped $\text{TiO}_2$                          | Remazol Black 5 | 95.6                       | 100        | --                                     | <i>RSC Adv.</i> , 2015, <b>5</b> , 88266                           |
| 6%-Ag- $\text{TiO}_2$                               | Methyl blue     | 97                         | 120        | 0.0221                                 | <i>Synth.</i> , 2019, <b>8</b> , 659                               |
| $\text{TiO}_2/\text{MgO}$ nanocomposite             | Methyl orange   | 83.2                       | 90         | 0.0319                                 | <i>Environ. Technol.</i> , 2021, <b>42</b> , 2278                  |
| $\text{MoS}_2\text{-TiO}_2@$ PAN membrane           | Methyl blue     | 97.73                      | 180        | --                                     | <i>Mater. Sci. Eng. B</i> , 2021, <b>169</b> , 115179              |
| $\text{TiO}_2/\text{PSEM}$ composite                | Rhodamine B     | 94                         | 80         | --                                     | <i>J. Inorg. Organomet. Polym. Mater.</i> , 2020, <b>30</b> , 2805 |
